# Supplementary material for: Poly-ε-Caprolactone/Halloysite Nanotube Composites for Resorbable Scaffolds: Effect of Processing Technology on Homogeneity and Electrospinning
Source: MDPI journal article supplement (doi:10.3390/polym13213772), 2021-10-31
Supplement: s1 [file s1]

# Poly- $\epsilon$ -Caprolactone/Halloysite Nanotube Composites for Resorbable Scaffolds: Effect of Processing Technology on Homogeneity and Electrospinning

Muriel Józó <sup>1,2</sup>, Róbert Várdai <sup>1,2</sup>, Nóra Hegyesi <sup>1,2</sup>, János Móczó <sup>1,2</sup> and Béla Pukánszky <sup>1,2,\*</sup>

<sup>1</sup> Laboratory of Plastics and Rubber Technology, Department of Physical Chemistry and Materials Science, Budapest University of Technology and Economics, P.O. Box 91, H-1521 Budapest, Hungary; jozo.muriel@vbk.bme.hu (M.J.); vardai.robert@vbk.bme.hu (R.V.); hegyesi.nora@vbk.bme.hu (N.H.); jmocz@edu.bme.hu (J.M.)

<sup>2</sup> Institute of Materials and Environmental Chemistry, Research Centre for Natural Sciences, ELKH Eötvös Loránd Research Network, P.O. Box 286, H-1519 Budapest, Hungary

\* Correspondence: pukanszky.bela@vbk.bme.hu; Tel.: +36-(14)-632015

## 1. The extent of aggregation

**Table S1.** Effect of halloysite content and sample preparation technology on aggregation in PCL/halloysite nanocomposites.

| Technology   | Halloysite (vol%) | Aggregate area ( $\mu\text{m}^2$ ) |               |
|--------------|-------------------|------------------------------------|---------------|
|              |                   | Average                            | Most frequent |
| Film casting | 1                 | 442.6 $\pm$ 577.9                  | 58.8          |
| Compression  |                   | 308.2 $\pm$ 497.5                  | 62.1          |
| Melt mixing  |                   | 54.7 $\pm$ 76.7                    | 5.8           |
| Film casting | 3                 | 471.7 $\pm$ 586.3                  | 72.9          |
| Compression  |                   | 350.3 $\pm$ 513.5                  | 77.3          |
| Melt mixing  |                   | 72.0 $\pm$ 89.8                    | 7.2           |
| Film casting | 5                 | 499.9 $\pm$ 652.3                  | 88.5          |
| Compression  |                   | 391.8 $\pm$ 687.1                  | 98.1          |
| Melt mixing  |                   | 83.2 $\pm$ 117.8                   | 9.6           |
| Film casting | 7                 | 521.1 $\pm$ 789.0                  | 141.0         |
| Compression  |                   | 769.6 $\pm$ 1411.2                 | 278.9         |
| Melt mixing  |                   | 215.0 $\pm$ 364.4                  | 46.4          |
| Film casting | 10                | 547.9 $\pm$ 874.1                  | 162.4         |
| Compression  |                   | 1078.1 $\pm$ 2348.4                | 443.3         |
| Melt mixing  |                   | 322.2 $\pm$ 398.4                  | 137.3         |

**Citation:** Józó, M.; Várdai, R.; Hegyesi, N.; Móczó, J.; Pukánszky, B. Poly- $\epsilon$ -Caprolactone/Halloysite Nanotube Composites for Resorbable Scaffolds: Effect of Processing Technology on Homogeneity and Electrospinning. *Polymers* **2021**, *13*, 3772. <https://doi.org/10.3390/polym13213772>

Academic Editors: Laura Aliotta; Vito Gigante and Andrea Lazzeri

Received: 14 September 2021

Accepted: 28 October 2021

Published: 31 October 2021

**Publisher's Note:** MDPI stays neutral with regard to jurisdictional claims in published maps and institutional affiliations.

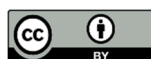

**Copyright:** © 2021 by the authors. Licensee MDPI, Basel, Switzerland. This article is an open access article distributed under the terms and conditions of the Creative Commons Attribution (CC BY) license (<http://creativecommons.org/licenses/by/4.0/>).

## 2. Results of tensile tests

**Table S2.** Results of tensile test of PCL/halloysite composites prepared by film casting.

| Halloysite content  |             | Modulus, E (GPa) |             | Yield stress, $\sigma_y$ (MPa) |             | Yield strain, $\varepsilon_y$ (%) |             | Tensile strength, $\sigma$ (MPa) |             | Strain, $\varepsilon$ (%) |             |
|---------------------|-------------|------------------|-------------|--------------------------------|-------------|-----------------------------------|-------------|----------------------------------|-------------|---------------------------|-------------|
| <b>Film casting</b> | <b>(v%)</b> | <b>Avg.</b>      | <b>Dev.</b> | <b>Avg.</b>                    | <b>Dev.</b> | <b>Avg.</b>                       | <b>Dev.</b> | <b>Avg.</b>                      | <b>Dev.</b> | <b>Avg.</b>               | <b>Dev.</b> |
| 0 HAL               | 0.00        | 0.34             | 0.01        | 11.25                          | 0.70        | 9.70                              | 2.35        | 26.67                            | 3.48        | 530.66                    | 59.41       |
| 1 HAL               | 1.00        | 0.47             | 0.06        | 13.37                          | 0.80        | 7.95                              | 0.93        | 25.87                            | 3.17        | 503.30                    | 38.65       |
| 3 HAL               | 3.00        | 0.50             | 0.03        | 14.09                          | 0.30        | 9.20                              | 1.17        | 26.85                            | 2.05        | 541.19                    | 36.00       |
| 5 HAL               | 5.00        | 0.57             | 0.06        | 13.92                          | 0.49        | 5.36                              | 0.39        | 19.46                            | 0.56        | 384.20                    | 13.70       |
| 7 HAL               | 7.00        | 0.56             | 0.05        | 12.64                          | 1.53        | 5.45                              | 0.78        | 14.23                            | 3.03        | 265.78                    | 83.11       |
| 10 HAL              | 10.00       | 0.59             | 0.02        | 11.54                          | 0.79        | 4.56                              | 1.28        | 10.78                            | 0.74        | 13.01                     | 5.83        |

**Table S3.** Results of tensile test of PCL/halloysite composites prepared by compression molding.

| Halloysite content         |             | Modulus, E (GPa) |             | Yield stress, $\sigma_y$ (MPa) |             | Yield strain, $\varepsilon_y$ (%) |             | Tensile strength, $\sigma$ (MPa) |             | Strain, $\varepsilon$ (%) |             |
|----------------------------|-------------|------------------|-------------|--------------------------------|-------------|-----------------------------------|-------------|----------------------------------|-------------|---------------------------|-------------|
| <b>Compression molding</b> | <b>(v%)</b> | <b>Avg.</b>      | <b>Dev.</b> | <b>Avg.</b>                    | <b>Dev.</b> | <b>Avg.</b>                       | <b>Dev.</b> | <b>Avg.</b>                      | <b>Dev.</b> | <b>Avg.</b>               | <b>Dev.</b> |
| 0 HAL                      | 0.00        | 0.39             | 0.03        | 14.62                          | 0.77        | 10.02                             | 0.64        | 17.80                            | 4.56        | 306.95                    | 70.53       |
| 1 HAL                      | 1.00        | 0.44             | 0.03        | 13.45                          | 0.68        | 8.02                              | 1.48        | 33.68                            | 5.25        | 581.85                    | 88.31       |
| 3 HAL                      | 3.00        | 0.51             | 0.06        | 13.03                          | 1.22        | 6.50                              | 0.75        | 19.21                            | 5.17        | 220.85                    | 204.18      |
| 5 HAL                      | 5.00        | 0.49             | 0.04        | 12.68                          | 0.44        | 6.12                              | 1.07        | 14.95                            | 3.28        | 246.83                    | 124.82      |
| 7 HAL                      | 7.00        | 0.51             | 0.03        | 11.35                          | 1.30        | 4.69                              | 1.56        | 11.98                            | 1.24        | 122.86                    | 136.13      |
| 10 HAL                     | 10.00       | 0.54             | 0.04        | 11.35                          | 0.69        | 3.50                              | 0.36        | 11.67                            | 0.95        | 4.29                      | 0.82        |

**Table S4.** Results of tensile test of PCL/halloysite composites prepared by internal mixer.

| Halloysite content    |             | Modulus, E (GPa) |             | Yield stress, $\sigma_y$ (MPa) |             | Yield strain, $\varepsilon_y$ (%) |             | Tensile strength, $\sigma$ (MPa) |             | Strain, $\varepsilon$ (%) |             |
|-----------------------|-------------|------------------|-------------|--------------------------------|-------------|-----------------------------------|-------------|----------------------------------|-------------|---------------------------|-------------|
| <b>Internal mixer</b> | <b>(v%)</b> | <b>Avg.</b>      | <b>Dev.</b> | <b>Avg.</b>                    | <b>Dev.</b> | <b>Avg.</b>                       | <b>Dev.</b> | <b>Avg.</b>                      | <b>Dev.</b> | <b>Avg.</b>               | <b>Dev.</b> |
| 0 HAL                 | 0.00        | 0.51             | 0.04        | 16.12                          | 0.54        | 10.27                             | 1.16        | 42.19                            | 1.25        | 679.86                    | 18.04       |
| 1 HAL                 | 1.00        | 0.54             | 0.05        | 15.89                          | 0.63        | 10.06                             | 0.39        | 39.19                            | 5.89        | 672.66                    | 97.21       |
| 3 HAL                 | 3.00        | 0.64             | 0.02        | 16.98                          | 0.12        | 8.90                              | 0.38        | 35.42                            | 4.55        | 599.66                    | 66.96       |
| 5 HAL                 | 5.00        | 0.68             | 0.02        | 16.37                          | 0.60        | 8.54                              | 0.28        | 34.96                            | 2.26        | 613.75                    | 23.07       |
| 7 HAL                 | 7.00        | 0.76             | 0.05        | 17.13                          | 1.40        | 6.73                              | 1.42        | 21.14                            | 3.74        | 318.57                    | 183.47      |
| 10 HAL                | 10.00       | 0.79             | 0.12        | 16.24                          | 1.27        | 6.10                              | 1.29        | 18.68                            | 3.39        | 258.53                    | 172.33      |

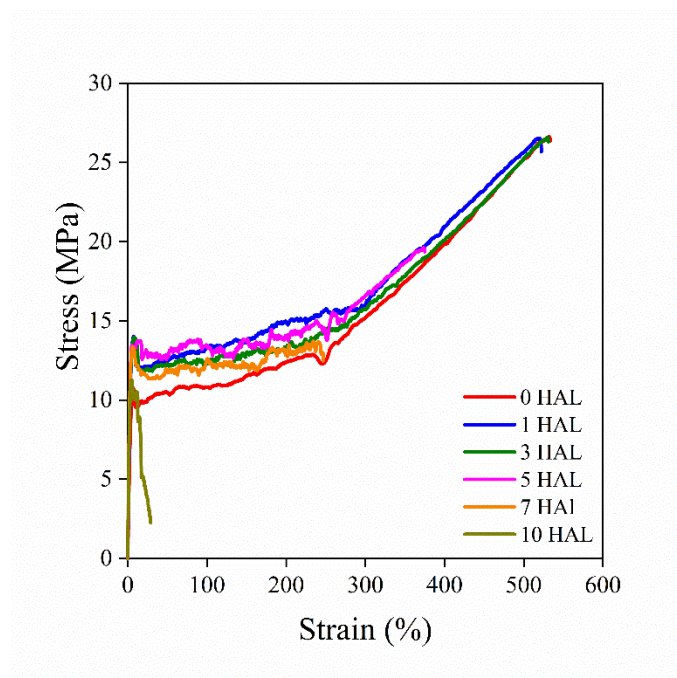

**Figure S1.** Stress vs. strain curves of the PCL/halloysite composites with different filler content prepared by film casting.

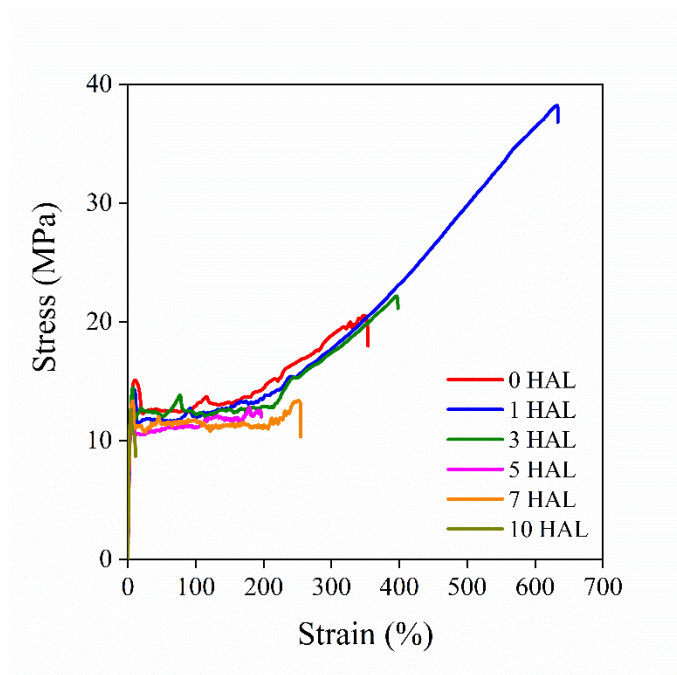

**Figure S2.** Stress vs. strain curves of the PCL/halloysite composites with different filler content prepared by compression molding.

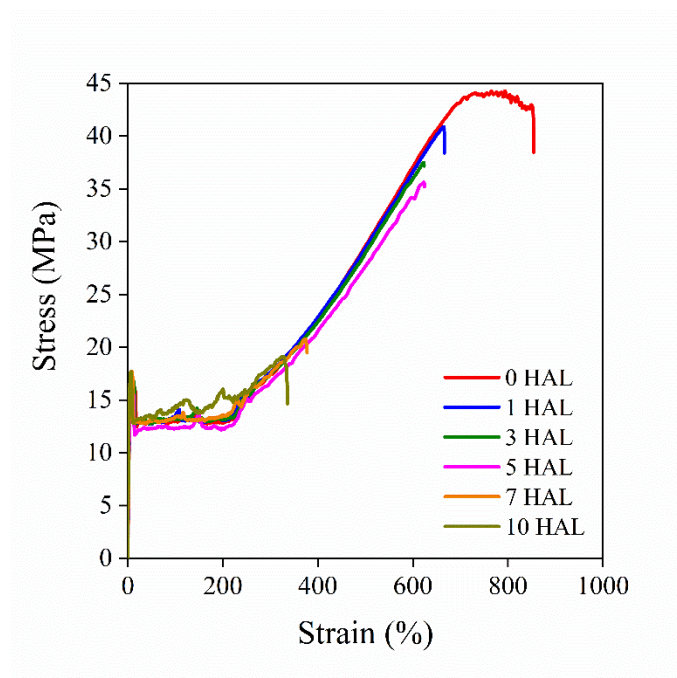

**Figure S3.** Stress vs. strain curves of the PCL/halloysite composites with different filler content prepared by internal mixer.

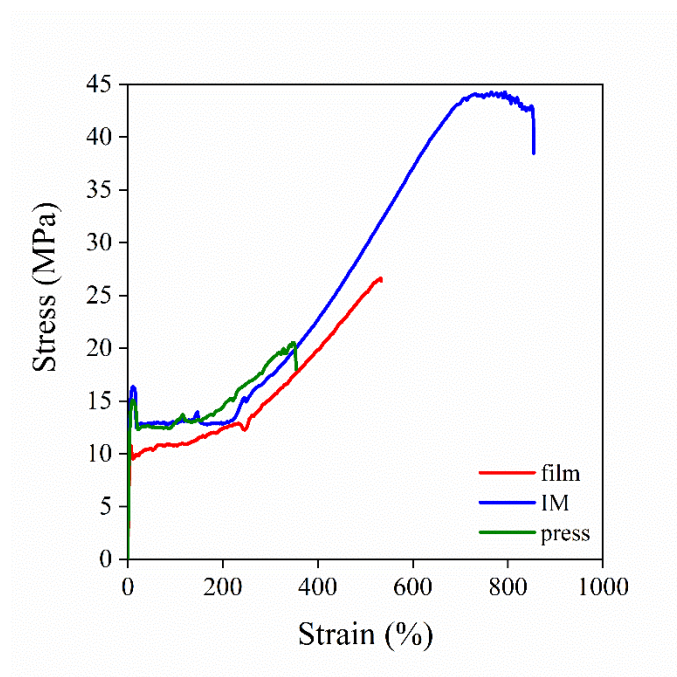

**Figure S4.** Stress vs. strain curves of the PCL/halloysite composites prepared by different technique at 0 vol% filler content.

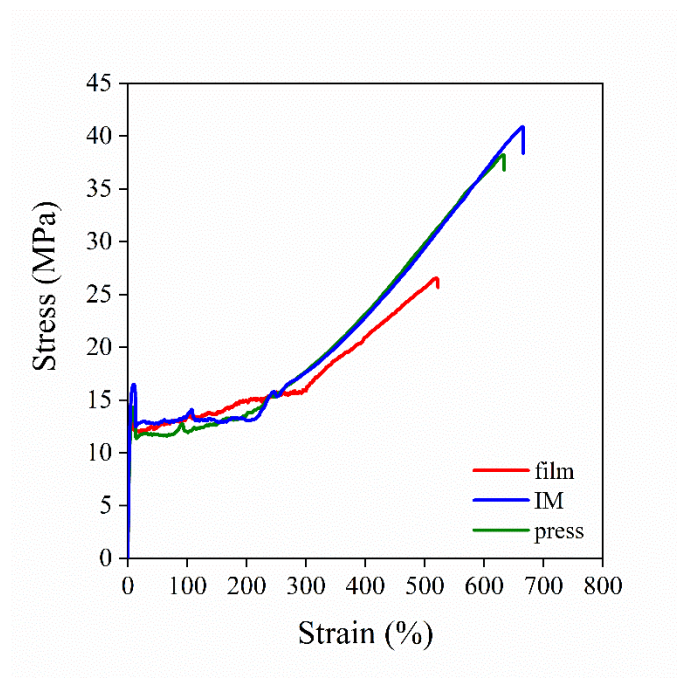

**Figure S5.** Stress vs. strain curves of the PCL/halloysite composites prepared by different technique at 1 vol% filler content.

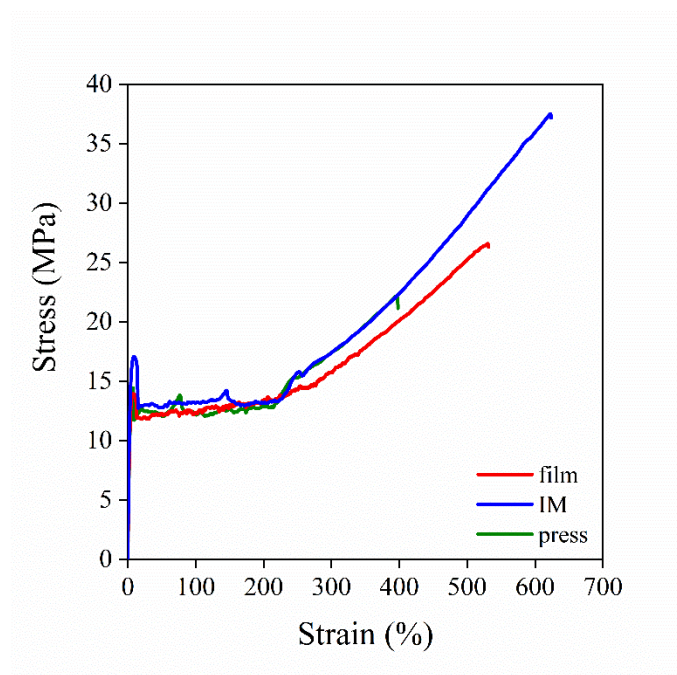

**Figure S6.** Stress vs. strain curves of the PCL/halloysite composites prepared by different technique at 3 vol% filler content.



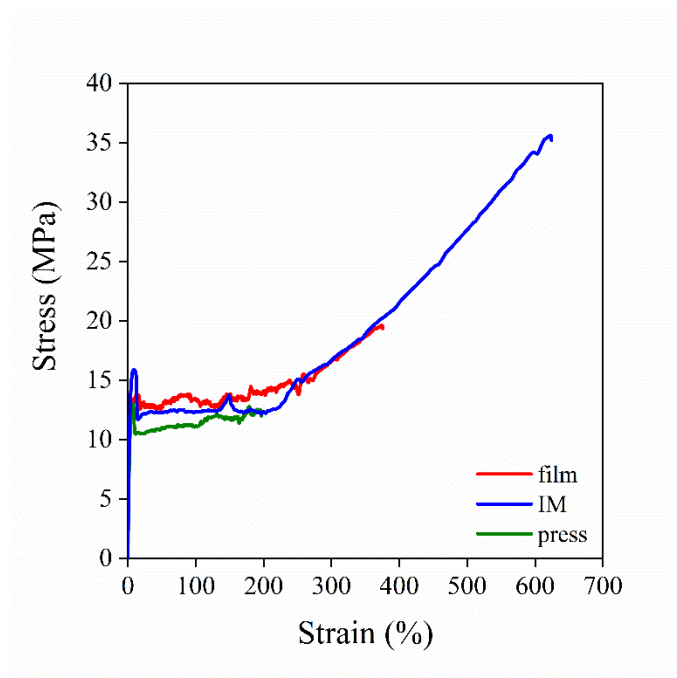

**Figure S7.** Stress vs. strain curves of the PCL/halloysite composites prepared by different technique at 5 vol% filler content.

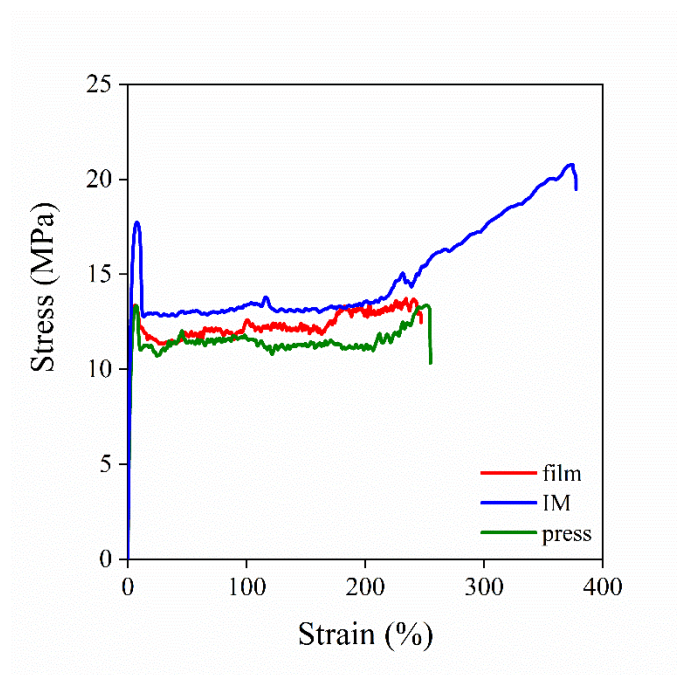

**Figure S8.** Stress vs. strain curves of the PCL/halloysite composites prepared by different technique at 7 vol% filler content.

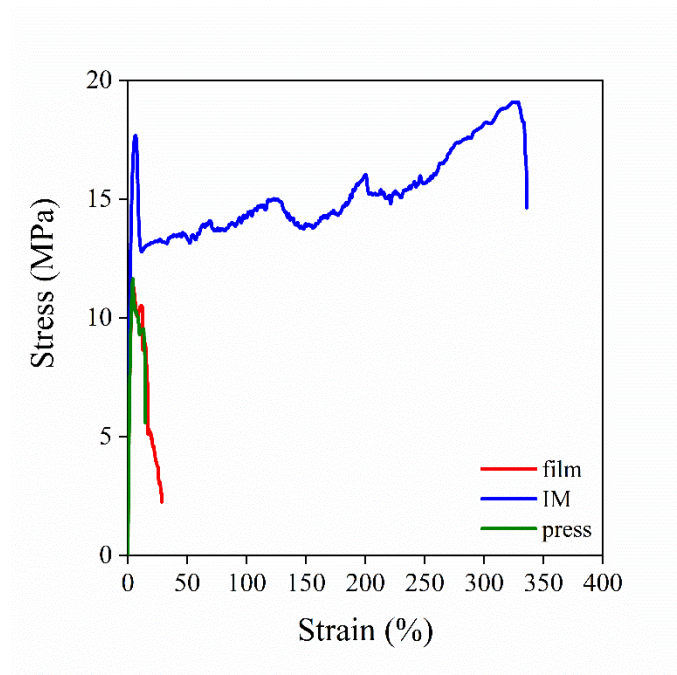

**Figure S9.** Stress vs. strain curves of the PCL/halloysite composites prepared by different technique at 10 vol% filler content.

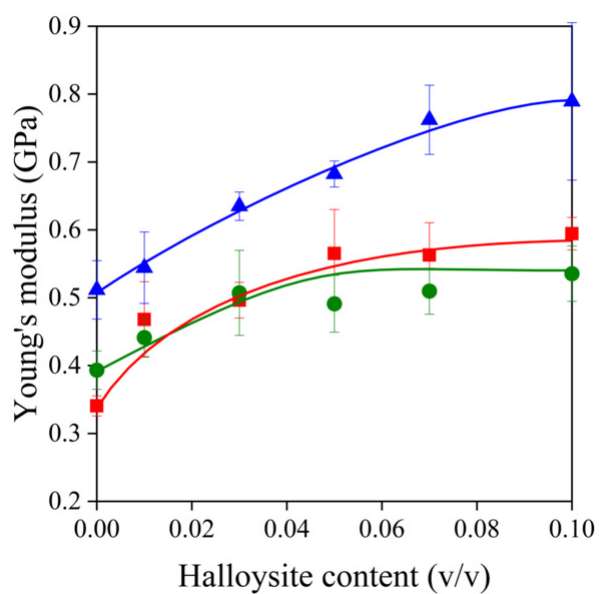

**Figure S10.** Effect of halloysite content on the Young's modulus of PCL/halloysite composites. Symbols: (■) film casting, (▲) internal mixer, (●) compression molding.

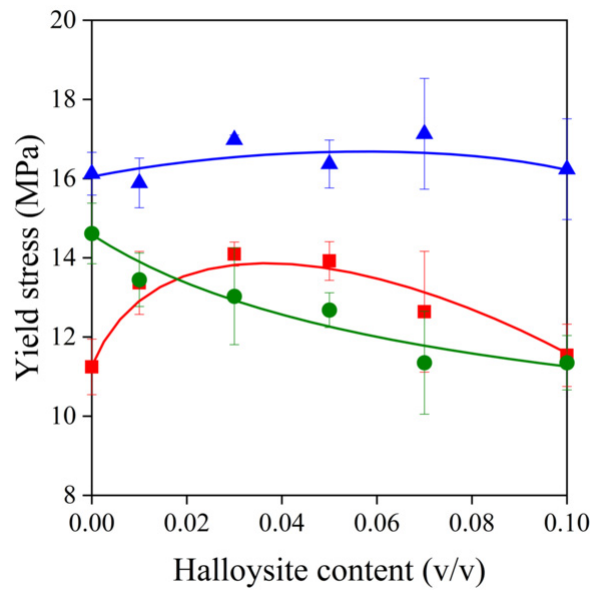

**Figure S11.** Effect of halloysite content on yield stress of PCL/halloysite composites. Symbols:(■) film casting, (▲) internal mixer, (●) compression molding.

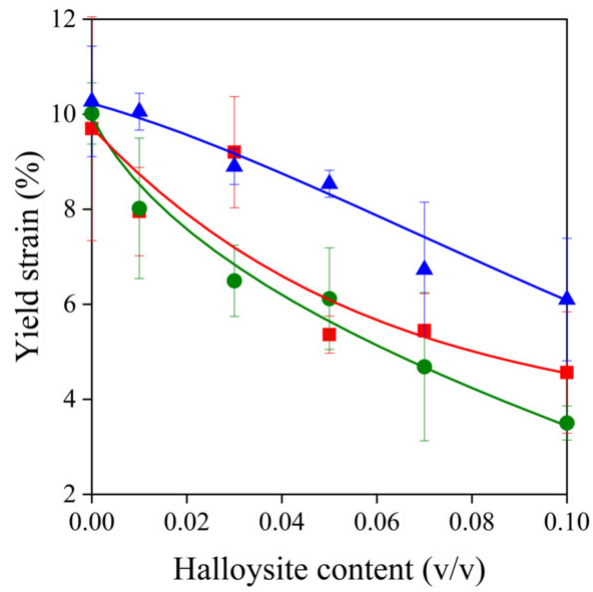

**Figure S12.** Effect of halloysite content on yield strain of PCL/halloysite composites. Symbols:(■) film casting, (▲) internal mixer, (●) compression molding.



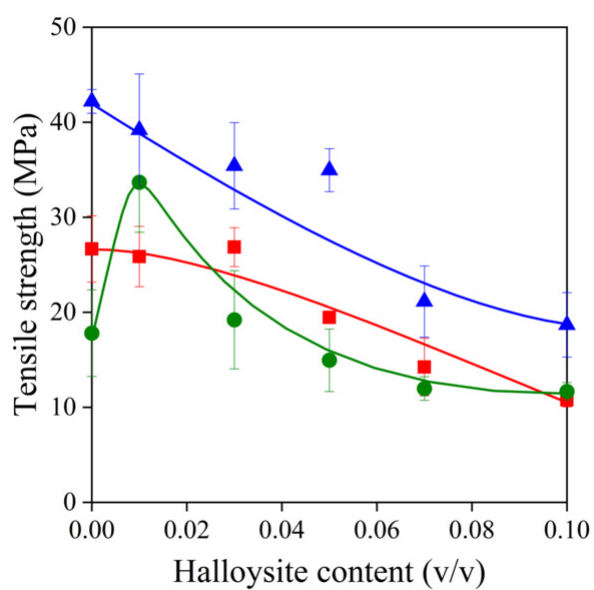

**Figure S13.** Effect of halloysite content on tensile strength of PCL/halloysite composites. Symbols: (■) film casting, (▲) internal mixer, (●) compression molding.

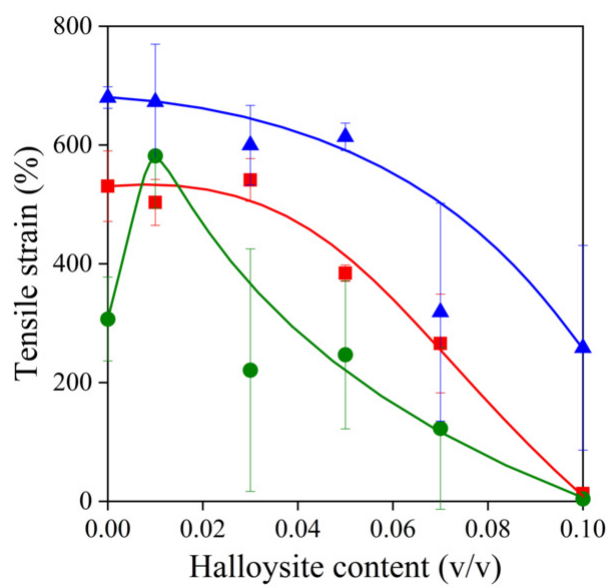

**Figure S14.** Effect of halloysite content on tensile strain of PCL/halloysite composites. Symbols: (■) film casting, (▲) internal mixer, (●) compression molding.

### 3. Results of thermogravimetric analysis (TGA)

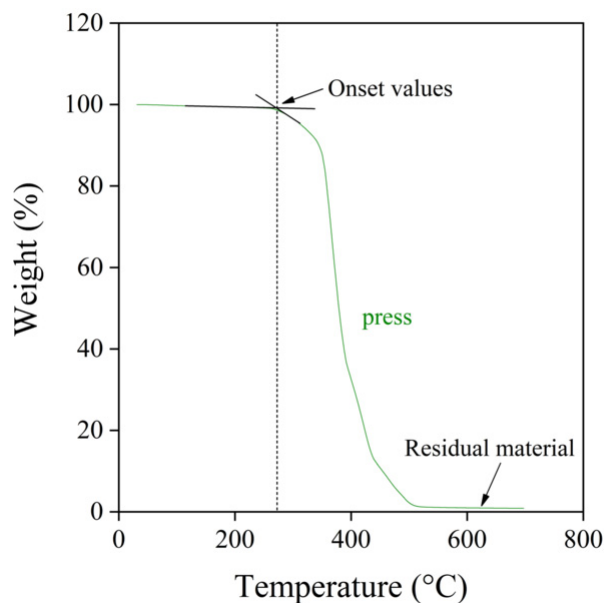

**Figure S15.** The principle of the determination of onset value. PCL/halloysite composite at 1 vol% halloysite content prepared by compression molding.

**Table S5.** Results of TGA measurements of PCL/halloysite composites prepared by film casting.

| Filler content |       | Onset, weight (%) | Onset, temperature (°C) | Residual material (%) |
|----------------|-------|-------------------|-------------------------|-----------------------|
| Film           | (v%)  |                   |                         |                       |
| 0 HAL          | 0.00  | 99.95 ± 0.23      | 266.43 ± 2.10           | 0.05 ± 0.00           |
| 1 HAL          | 1.00  | 99.33 ± 0.21      | 266.48 ± 3.16           | 1.56 ± 0.48           |
| 3 HAL          | 3.00  | 97.47 ± 0.25      | 271.17 ± 3.89           | 0.57 ± 1.23           |
| 5 HAL          | 5.00  | 98.03 ± 0.32      | 270.14 ± 3.41           | 4.59 ± 1.88           |
| 7 HAL          | 7.00  | 97.70 ± 0.67      | 275.68 ± 3.03           | 5.40 ± 2.56           |
| 10 HAL         | 10.00 | 97.42 ± 0.81      | 275.15 ± 4.42           | 11.02 ± 2.04          |

**Table S6.** Results of TGA measurements of PCL/halloysite composites prepared by compression molding.

| Filler content |       | Onset, weight (%) | Onset, temperature (°C) | Residual material (%) |
|----------------|-------|-------------------|-------------------------|-----------------------|
| Press          | (v%)  |                   |                         |                       |
| 0 HAL          | 0.00  | 98.96 ± 0.28      | 280.26 ± 3.09           | 0.00 ± 0.00           |
| 1 HAL          | 1.00  | 99.08 ± 0.07      | 274.13 ± 3.51           | 0.99 ± 0.68           |
| 3 HAL          | 3.00  | 99.34 ± 0.14      | 270.75 ± 3.83           | 2.65 ± 1.71           |
| 5 HAL          | 5.00  | 99.12 ± 0.61      | 272.42 ± 4.06           | 7.11 ± 2.66           |
| 7 HAL          | 7.00  | 99.21 ± 0.93      | 262.37 ± 3.13           | 12.83 ± 3.54          |
| 10 HAL         | 10.00 | 98.88 ± 0.74      | 265.08 ± 3.99           | 9.96 ± 2.87           |

**Table S7.** Results of TGA measurements of PCL/halloysite composites prepared by internal mixer.

| Filler content |       | Onset, weight (%) | Onset, temperature (°C) | Residual material (%) |
|----------------|-------|-------------------|-------------------------|-----------------------|
| IM             | (v%)  |                   |                         |                       |
| 0 HAL          | 0.00  | 96.12 ± 0.67      | 263.48 ± 2.31           | 0.00 ± 0.00           |
| 1 HAL          | 1.00  | 98.66 ± 0.75      | 266.25 ± 2.72           | 0.00 ± 1.32           |
| 3 HAL          | 3.00  | 98.82 ± 0.93      | 269.76 ± 3.56           | 2.62 ± 2.11           |
| 5 HAL          | 5.00  | 98.10 ± 0.08      | 272.74 ± 2.43           | 5.26 ± 1.73           |
| 7 HAL          | 7.00  | 98.47 ± 0.45      | 268.78 ± 3.67           | 8.96 ± 1.16           |
| 10 HAL         | 10.00 | 98.64 ± 0.83      | 263.92 ± 3.34           | 14.09 ± 0.73          |

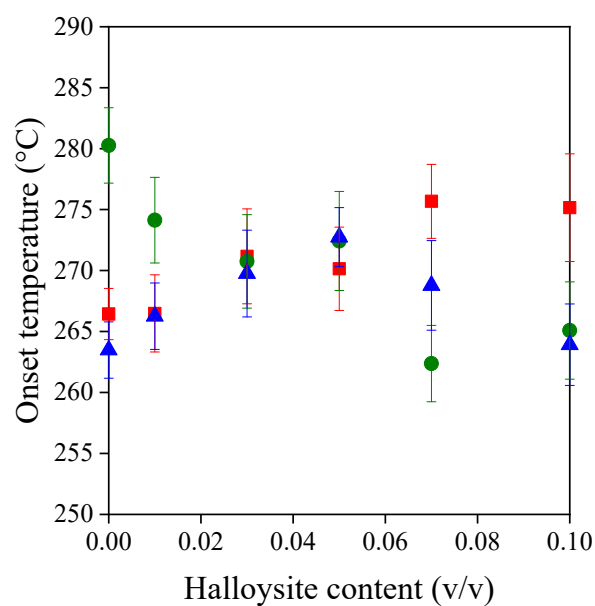

**Figure S16.** Onset temperature values of PCL/halloysite composites. Symbols:(■) film casting, (▲) internal mixer, (●) compression molding.

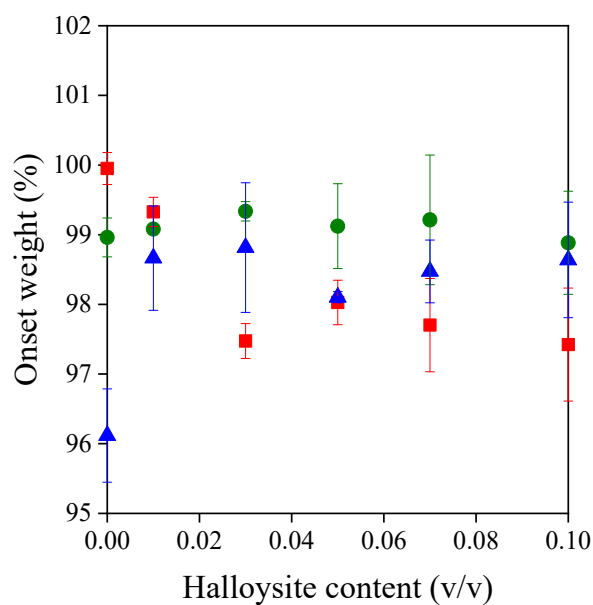

**Figure S17.** Onset weight values of PCL/halloysite composites. Symbols:(■) film casting, (▲) internal mixer, (●) compression molding.

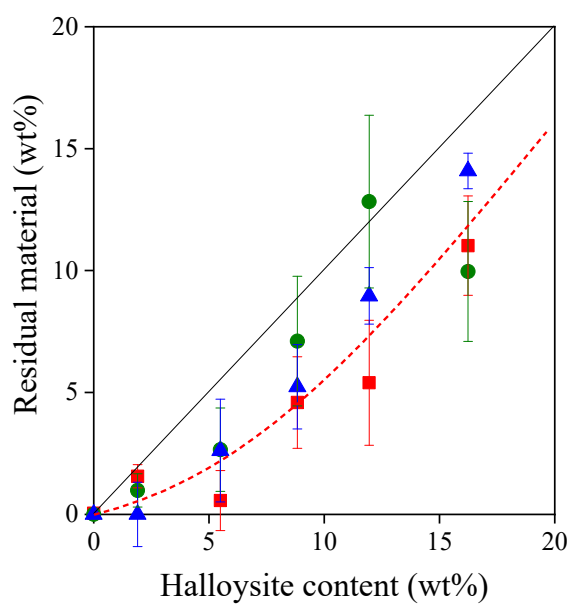

**Figure S18.** The residual material mass of PCL/halloysite composites as function of filler content. Symbols: (■) film casting, (▲) internal mixer, (●) compression molding.

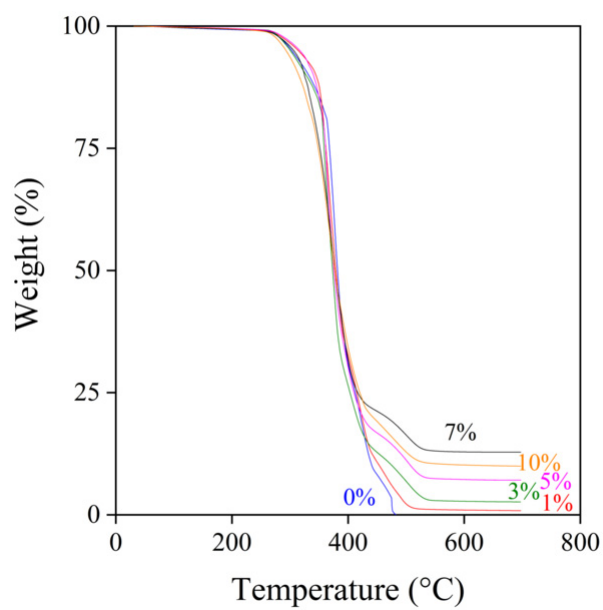

**Figure S19.** TGA curves of the PCL/halloysite composites with different filler content prepared by compression molding.

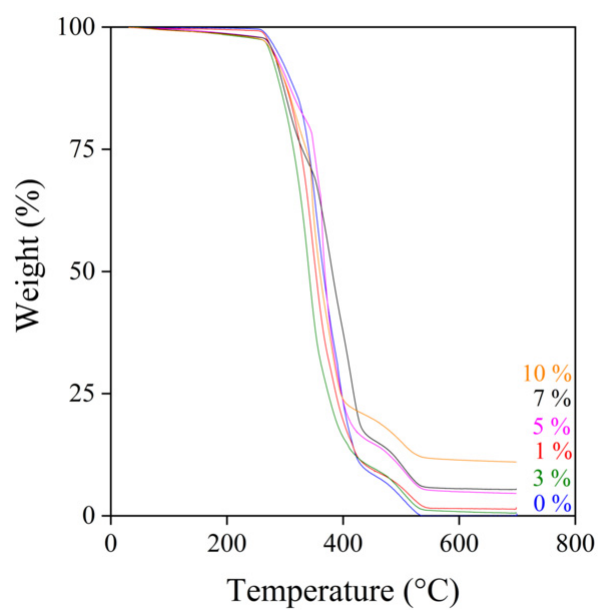

**Figure S20.** TGA curves of the PCL/halloysite composites with different filler content prepared by film casting.

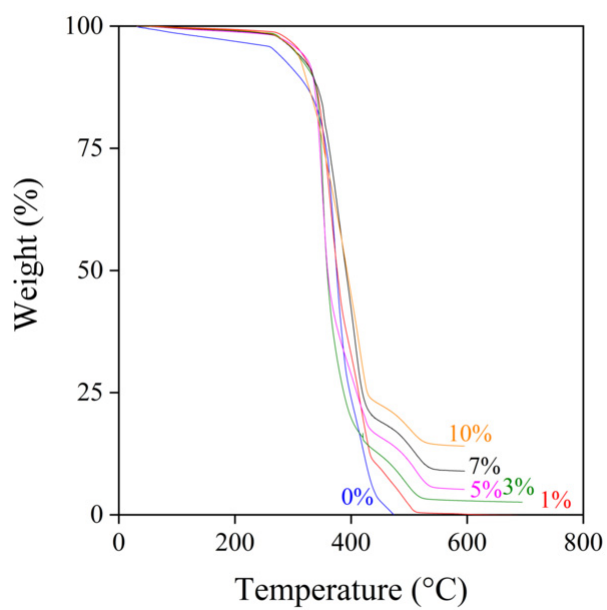

**Figure S21.** TGA curves of the PCL/halloysite composites with different filler content prepared by internal mixer.

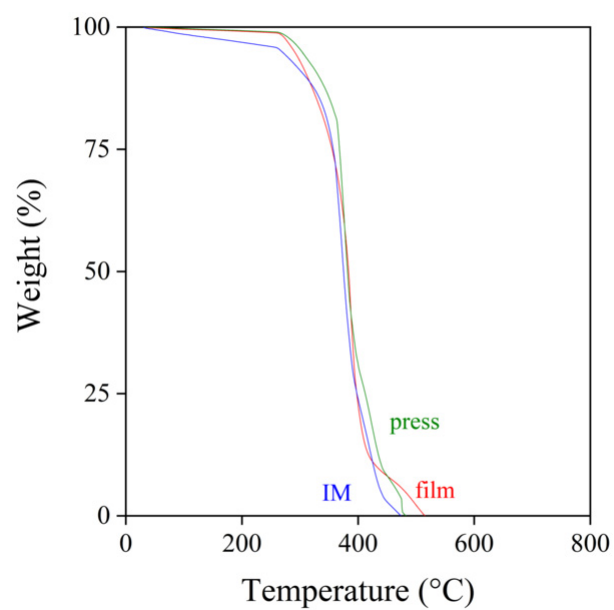

**Figure S22.** Characteristic TGA curves of the PCL/halloysite composites prepared by different technique at 0 vol% filler content.

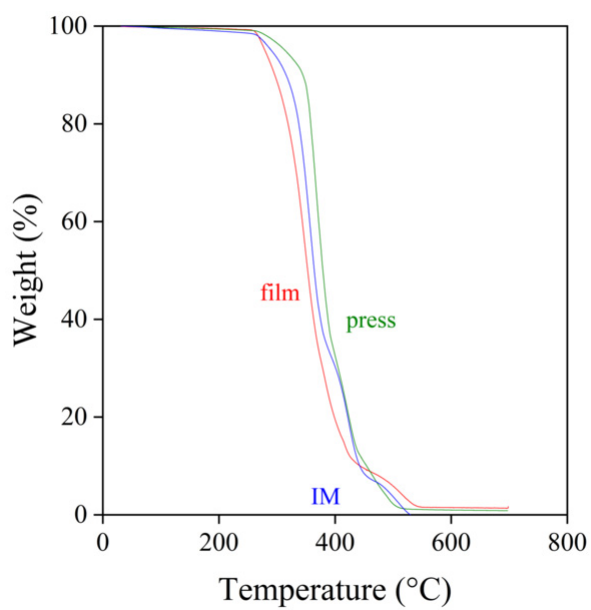

**Figure S23.** Characteristic TGA curves of the PCL/halloysite composites prepared by different technique at 1 vol% filler content.



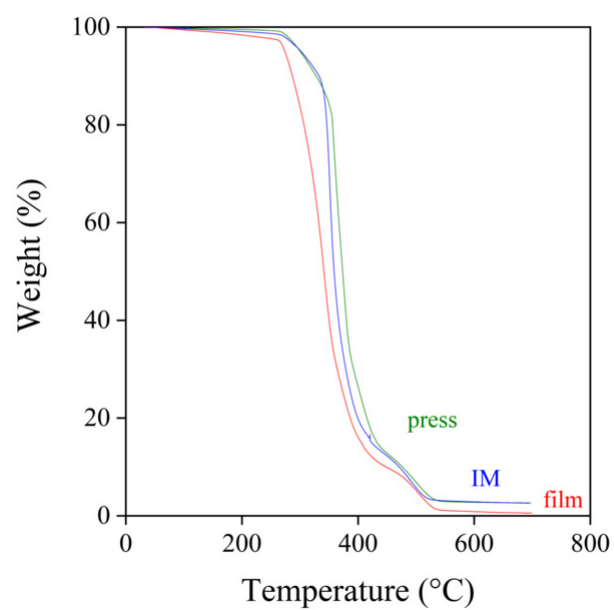

**Figure S24.** Characteristic TGA curves of the PCL/halloysite composites prepared by different technique at 3 vol% filler content.

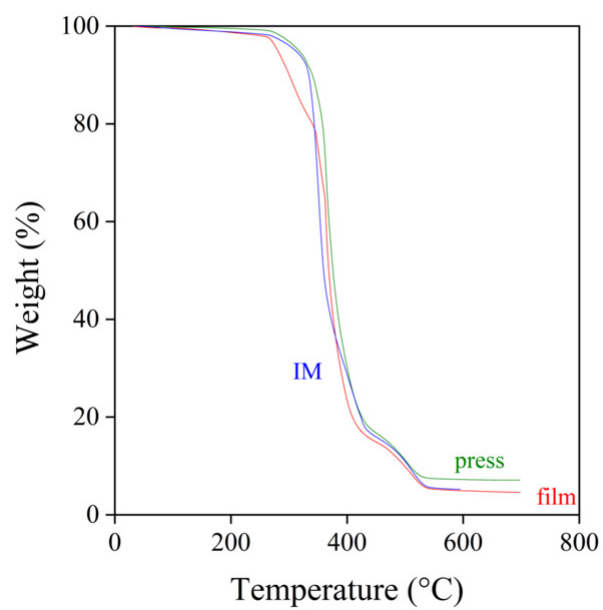

**Figure S25.** Characteristic TGA curves of the PCL/halloysite composites prepared by different technique at 5 vol% filler content.

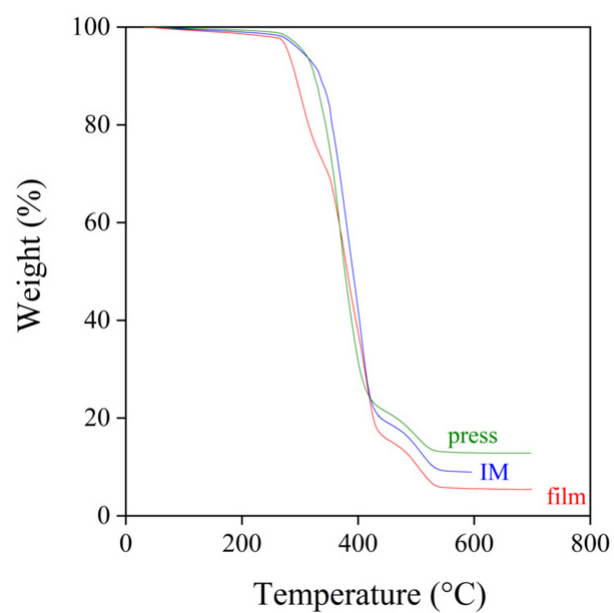

**Figure S26.** Characteristic TGA curves of the PCL/halloysite composites prepared by different technique at 7 vol% filler content.

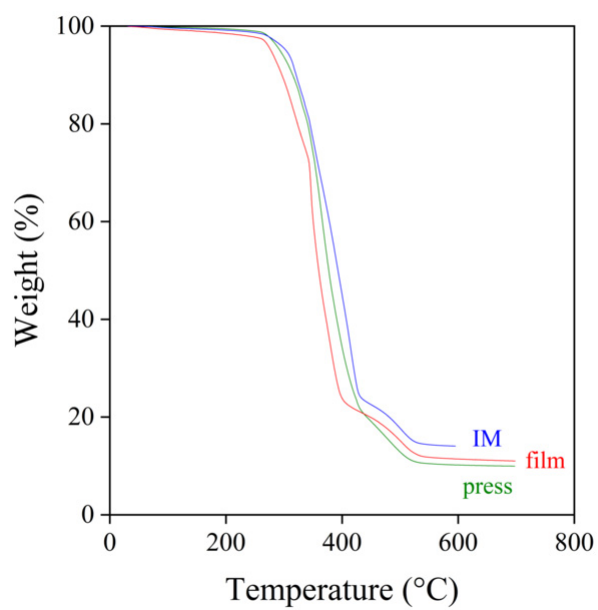

**Figure S27.** Characteristic TGA curves of the PCL/halloysite composites prepared by different technique at 10 vol% filler content.

#### 4. Results of differential scanning calorimetry (DSC)

**Table S8.** Results of DSC measurements of PCL/halloysite composites with variant filler content prepared by different technology.

| Technology/Sample   |           | Halloysite<br>content (v%) | Cooling             |                       | Heating (second heating) |                     |                       |
|---------------------|-----------|----------------------------|---------------------|-----------------------|--------------------------|---------------------|-----------------------|
|                     |           |                            | T <sub>c</sub> (°C) | ΔH <sub>c</sub> (J/g) | T <sub>g</sub> (°C)      | T <sub>m</sub> (°C) | ΔH <sub>m</sub> (J/g) |
| film casting        | PCL/0Hal  | 0                          | 28.19               | -70.09                | -63.89                   | 54.79               | 75.72                 |
|                     | PCL/1Hal  | 1                          | 32.17               | -69.76                | -61.34                   | 55.61               | 74.67                 |
|                     | PCL/3Hal  | 3                          | 29.68               | -68.52                | -63.45                   | 55.28               | 73.05                 |
|                     | PCL/5Hal  | 5                          | 29.36               | -69.30                | -62.46                   | 54.45               | 71.13                 |
|                     | PCL/7Hal  | 7                          | 29.03               | -70.81                | -61.55                   | 53.95               | 73.23                 |
|                     | PCL/10Hal | 10                         | 31.47               | -73.27                | -59.24                   | 56.73               | 77.22                 |
| internal mixer      | PCL/0Hal  | 0                          | 30.71               | -55.42                | -61.07                   | 55.59               | 64.01                 |
|                     | PCL/1Hal  | 1                          | 31.40               | -68.12                | -62.33                   | 56.61               | 69.70                 |
|                     | PCL/3Hal  | 3                          | 29.90               | -59.69                | -61.87                   | 55.27               | 65.56                 |
|                     | PCL/5Hal  | 5                          | 30.40               | -59.94                | -61.95                   | 55.95               | 64.82                 |
|                     | PCL/7Hal  | 7                          | 31.68               | -56.87                | -61.60                   | 57.55               | 64.46                 |
|                     | PCL/10Hal | 10                         | 31.39               | -63.23                | -                        | 54.28               | 59.96                 |
| compression molding | PCL/0Hal  | 0                          | 30.40               | -61.94                | -56.99                   | 54.95               | 62.47                 |
|                     | PCL/1Hal  | 1                          | 30.23               | -63.66                | -62.29                   | 54.29               | 66.17                 |
|                     | PCL/3Hal  | 3                          | 30.54               | -58.12                | -61.25                   | 54.10               | 61.98                 |
|                     | PCL/5Hal  | 5                          | 31.55               | -63.18                | -59.72                   | 55.94               | 65.74                 |
|                     | PCL/7Hal  | 7                          | 29.41               | -66.27                | -61.41                   | 54.29               | 67.00                 |
|                     | PCL/10Hal | 10                         | 31.06               | -66.64                | -62.61                   | 54.78               | 71.96                 |

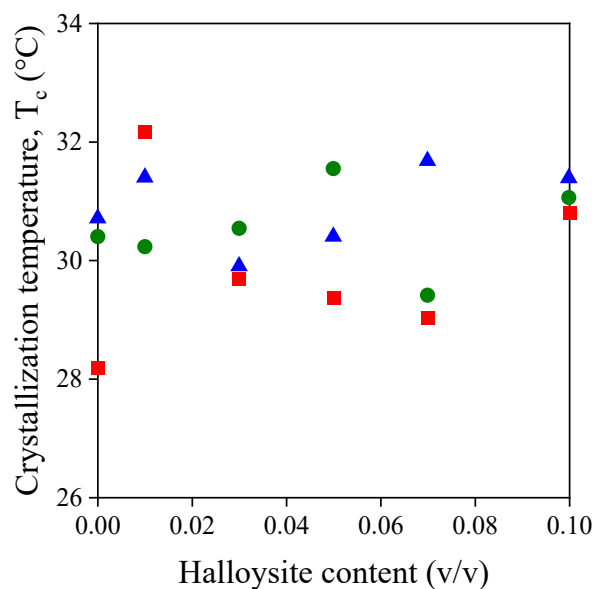

**Figure S28.** Effect of halloysite content on crystallization temperature of PCL/halloysite composite. Symbols:(■) film casting, (▲) internal mixer, (●) compression molding.

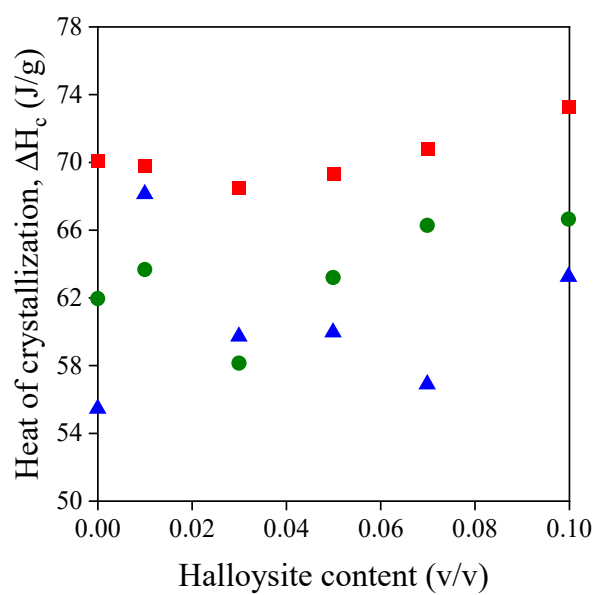

**Figure S29.** Effect of halloysite content on crystallization enthalpy ( $\Delta H_c$ ) of PCL/halloysite composite. Symbols: (■) film casting, (▲) internal mixer, (●) compression molding.

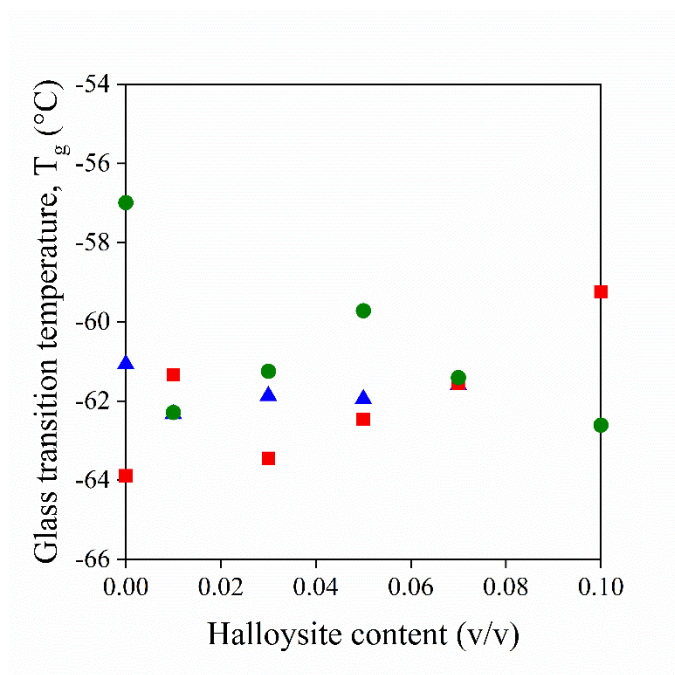

**Figure S30.** Effect of halloysite content on transition temperature of PCL/halloysite composite derived from second heating. Symbols: (■) film casting, (▲) internal mixer, (●) compression molding.

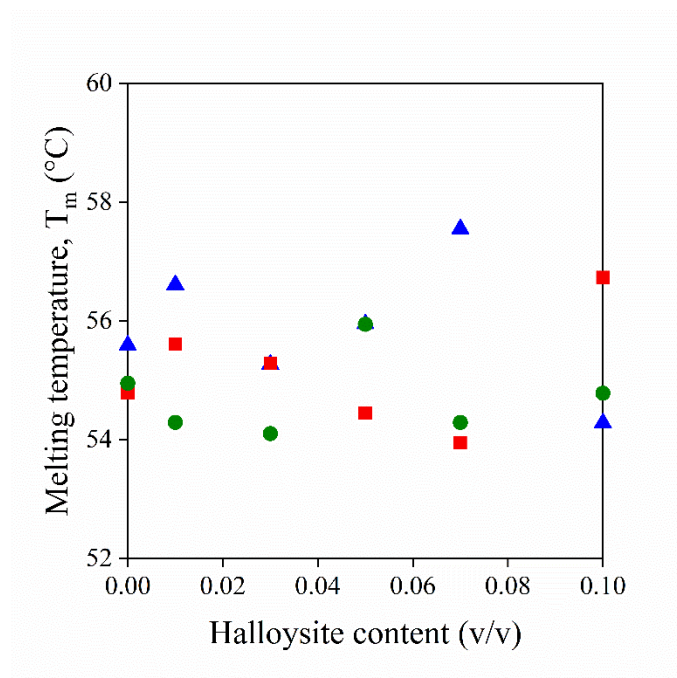

**Figure S31.** Effect of halloysite content on melting temperature of PCL/halloysite composite derived from second heating. Symbols:(■) film casting, (▲) internal mixer, (●) compression molding.

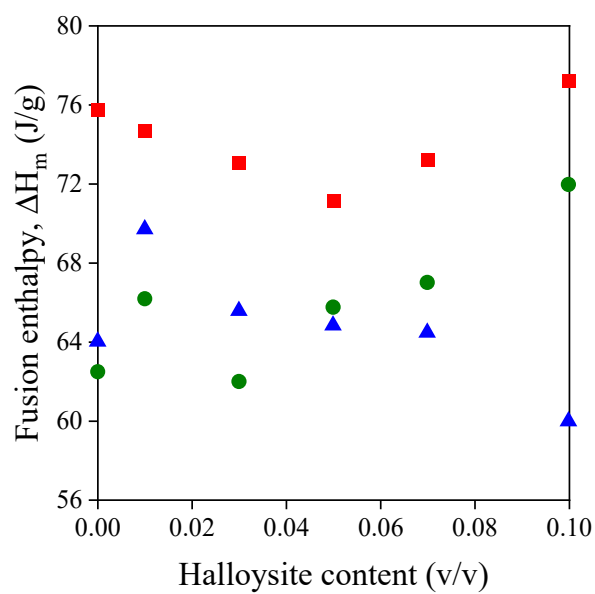

**Figure S32.** Effect of halloysite content on melting enthalpy ( $\Delta H_m$ ) of PCL/halloysite composite derived from second heating. Symbols:(■) film casting, (▲) internal mixer, (●) compression molding.

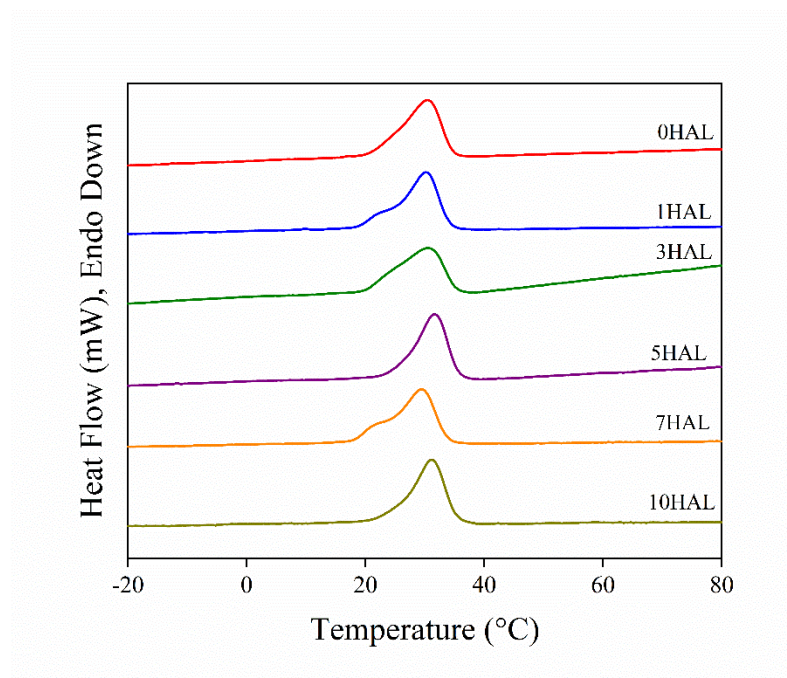

**Figure S33.** Crystallization curves of PCL/Halloysite composites with different filler content prepared by compression molding.

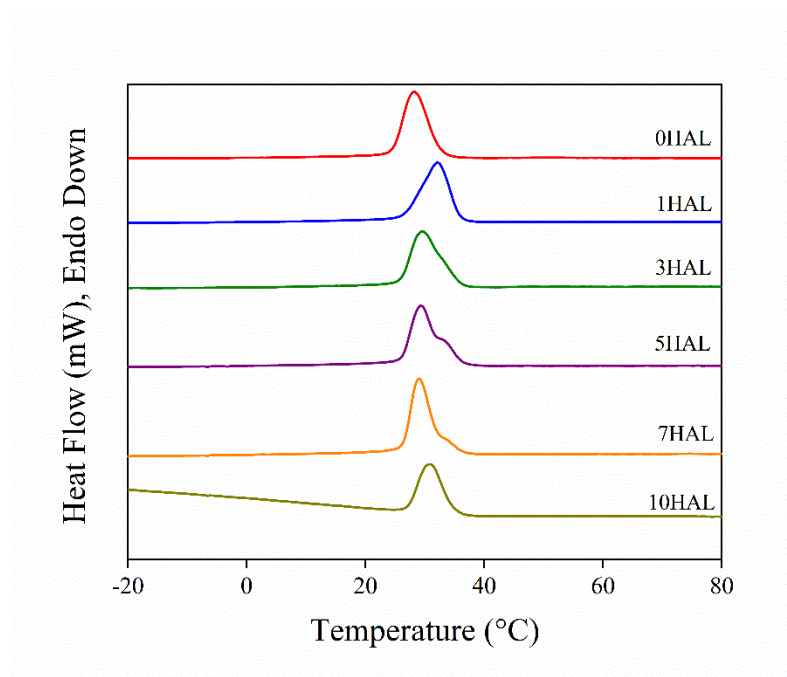

**Figure S34.** Crystallization curves of PCL/Halloysite composites with different filler content prepared by film casting.



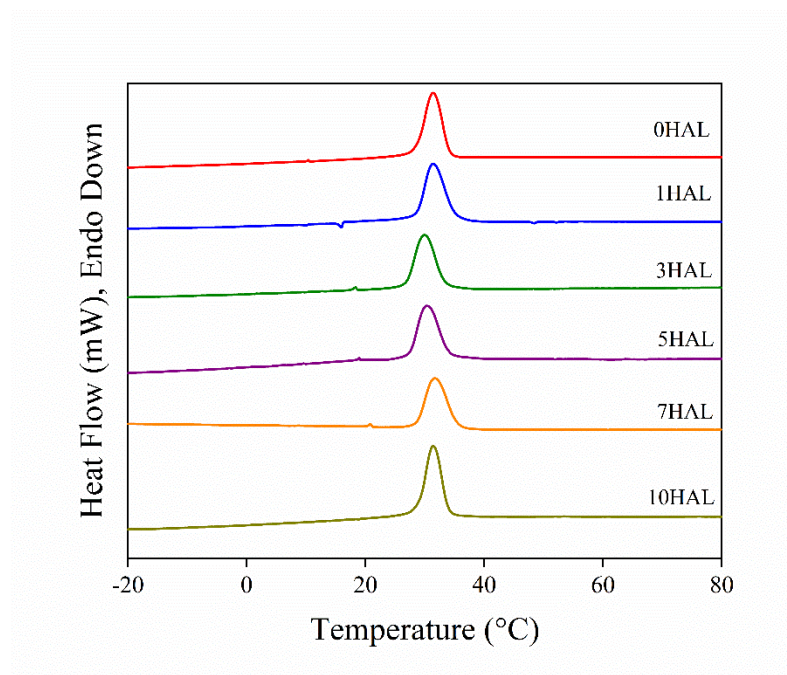

**Figure S35.** Crystallization curves of PCL/Halloysite composites with different filler content prepared by internal mixer.

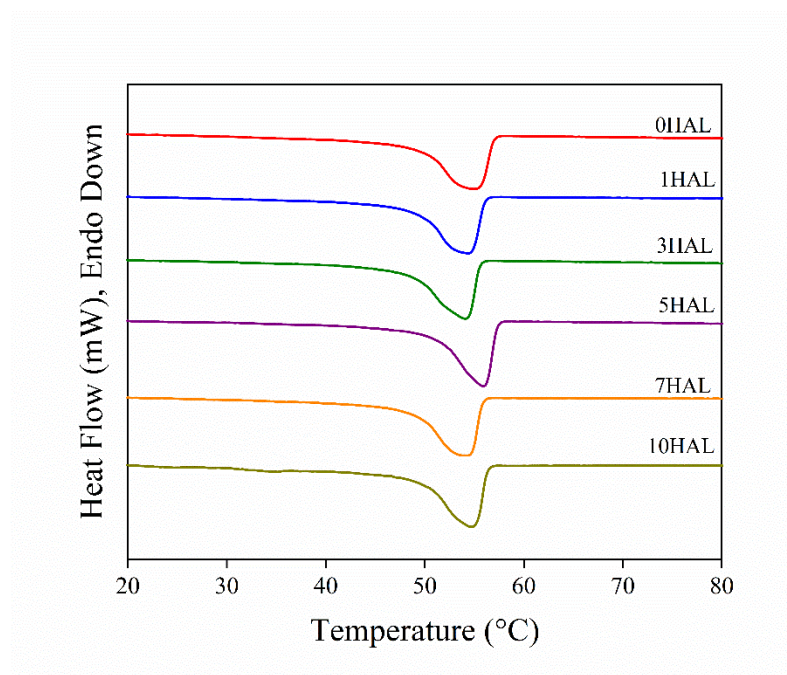

**Figure S36.** Second heating run of DSC curves of PCL/Halloysite composites with different filler content prepared by compression molding.

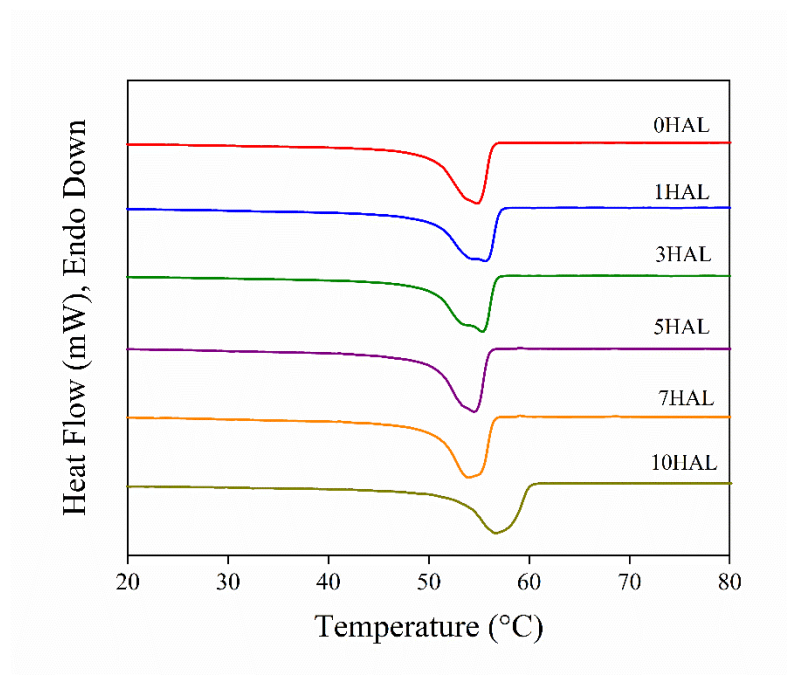

**Figure S37.** Second heating run of DSC curves of PCL/Halloysite composites with different filler content prepared by film casting.

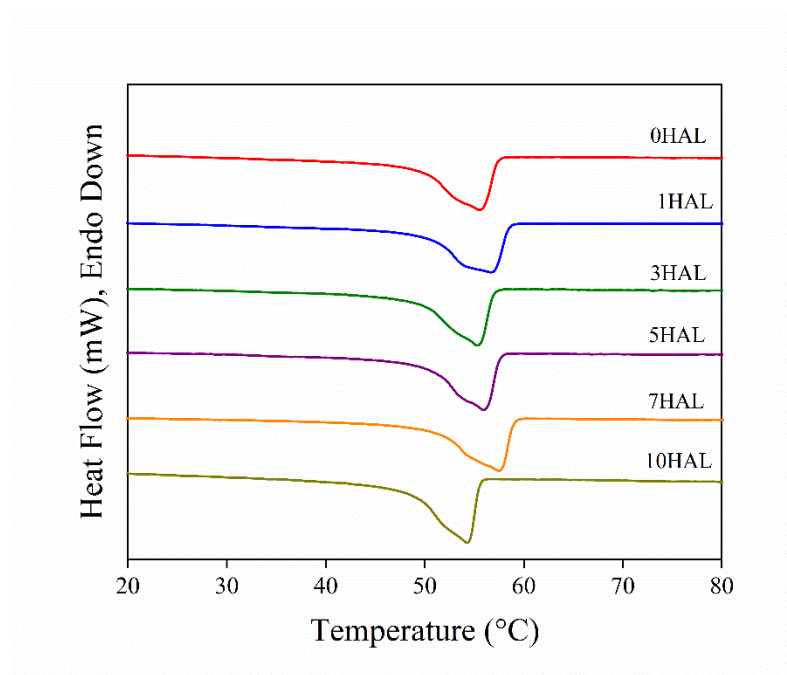

**Figure S38.** Second heating run of DSC curves of PCL/Halloysite composites with different filler content prepared by internal mixer.

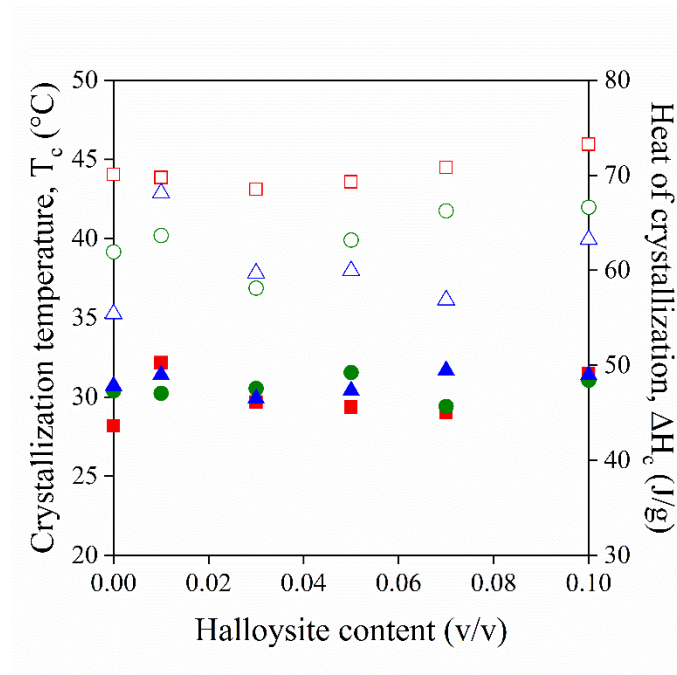

**Figure S39.** Crystallization temperature ( $T_c$ ) and crystallization enthalpy ( $\Delta H_c$ ) of PCL/Halloysite composites as a function of halloysite content. Symbols:  $T_c$ : (■) film casting, (▲) internal mixer, (●) compression molding,  $\Delta H_c$ : (□) film casting, (△) internal mixer, (○) compression molding.

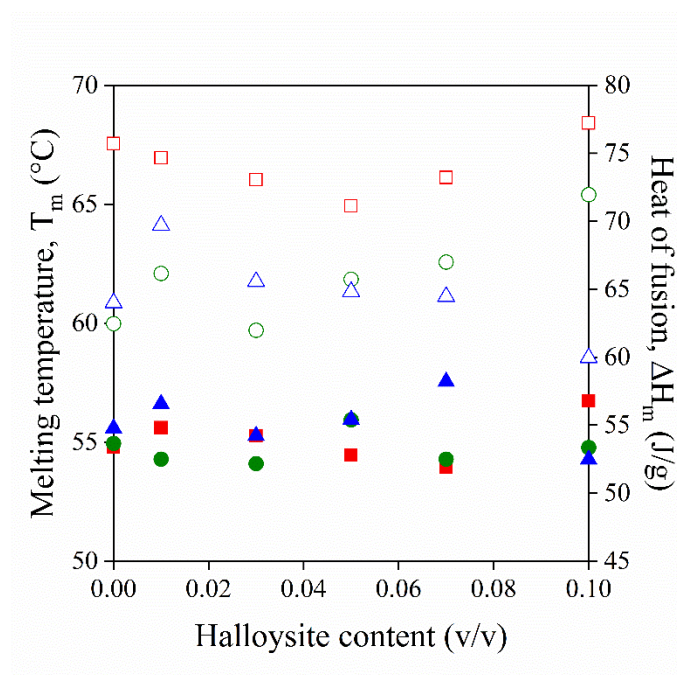

**Figure S40.** Melting temperature ( $T_m$ ) and melting enthalpy ( $\Delta H_m$ ) of PCL/Halloysite composites as a function of halloysite content. Symbols:  $T_c$ : (■) film casting, (▲) internal mixer, (●) compression molding,  $\Delta H_c$ : (□) film casting, (△) internal mixer, (○) compression molding.

## 5. Results of dynamical mechanical analysis (DMA)

**Table S9.** Results of DMA measurements of PCL/halloysite composites prepared by film casting.

| film casting | Sample    | $\tan \delta$ (°C) | $E''$ (°C) |
|--------------|-----------|--------------------|------------|
|              | PCL_0HAL  | -46.60             | -58.10     |
|              | PCL_1HAL  | -46.70             | -58.40     |
|              | PCL_3HAL  | -48.90             | -57.90     |
|              | PCL_5HAL  | -47.30             | -59.29     |
|              | PCL_7HAL  | -49.50             | -57.10     |
|              | PCL_10HAL | -42.70             | -54.40     |

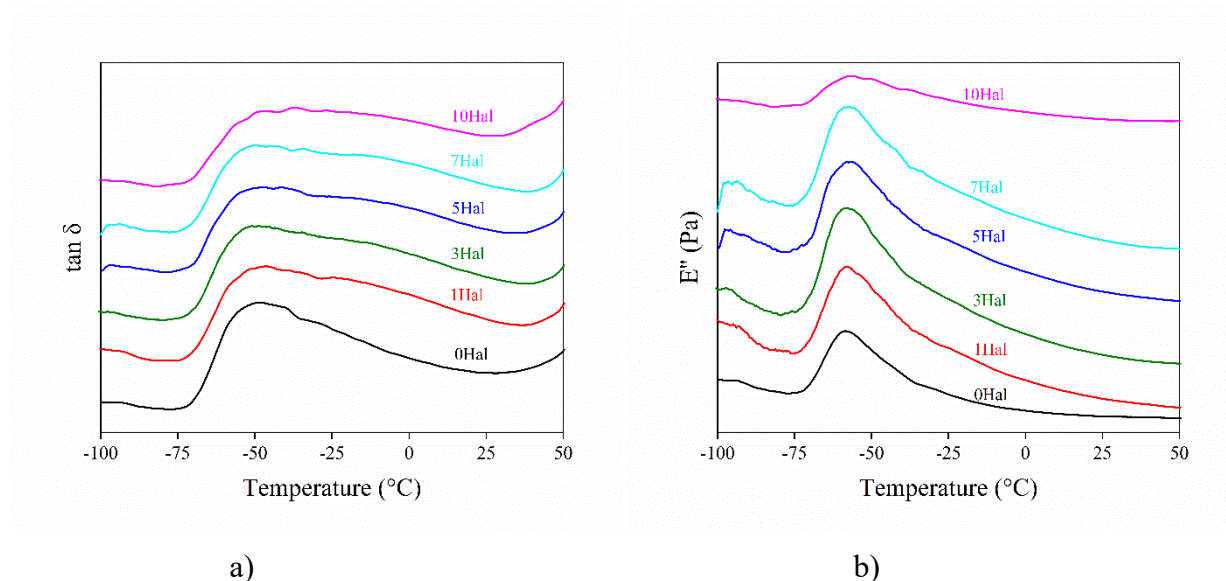

**Figure S41.** Results of DMA measurements of PCL/halloysite composites prepared by film casting. a)  $\tan \delta$ , b) loss modulus.

**Table S10.** Results of DMA measurements of PCL/halloysite composites prepared by compression molding.

| compression molding | Sample    | $\tan \delta$ | $E''$ (°C) |
|---------------------|-----------|---------------|------------|
|                     | PCL_0HAL  | -50.70        | -60.40     |
|                     | PCL_1HAL  | -50.50        | -59.70     |
|                     | PCL_3HAL  | -52.05        | -59.91     |
|                     | PCL_5HAL  | -49.60        | -59.60     |
|                     | PCL_7HAL  | -49.45        | -57.73     |
|                     | PCL_10HAL | -51.44        | -59.86     |



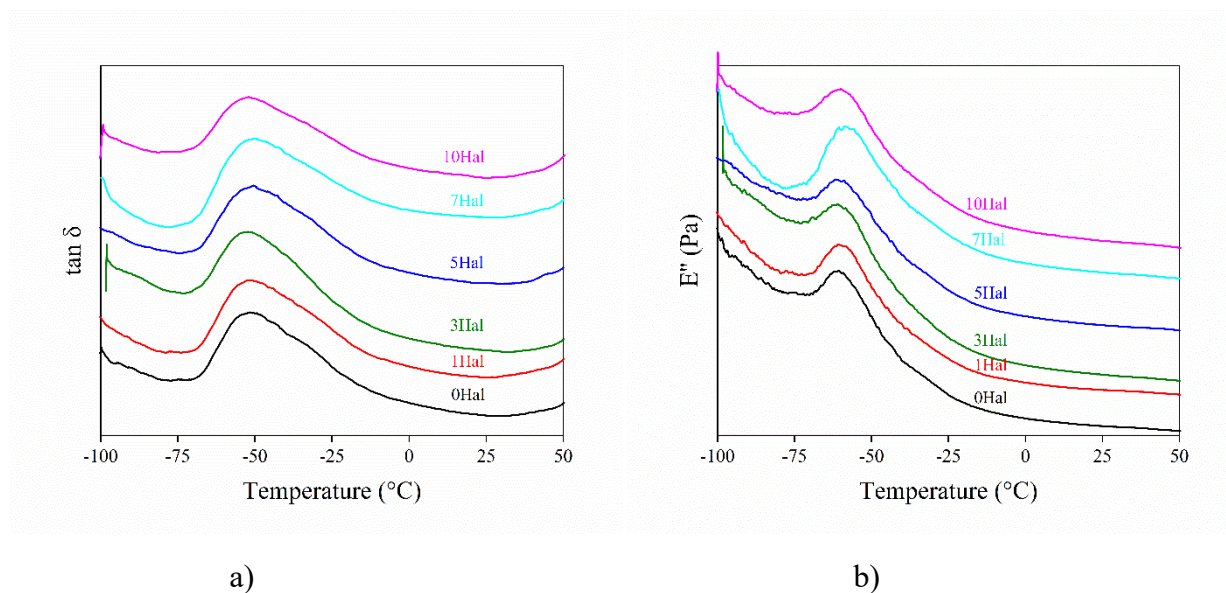

**Figure S42.** Results of DMA measurements of PCL/halloysite composites prepared by compression molding. **a)**  $\tan \delta$ , **b)** loss modulus.

**Table S11.** Results of DMA measurements of PCL/halloysite composites prepared by internal mixer.

| internal mixer | Sample    | $\tan \delta$ | $E''$ (°C) |
|----------------|-----------|---------------|------------|
|                | PCL_0HAL  | -50.60        | -59.60     |
|                | PCL_1HAL  | -51.40        | -59.10     |
|                | PCL_3HAL  | -49.60        | -57.60     |
|                | PCL_5HAL  | -50.00        | -58.20     |
|                | PCL_7HAL  | -50.10        | -58.10     |
|                | PCL_10HAL | -50.00        | -58.70     |

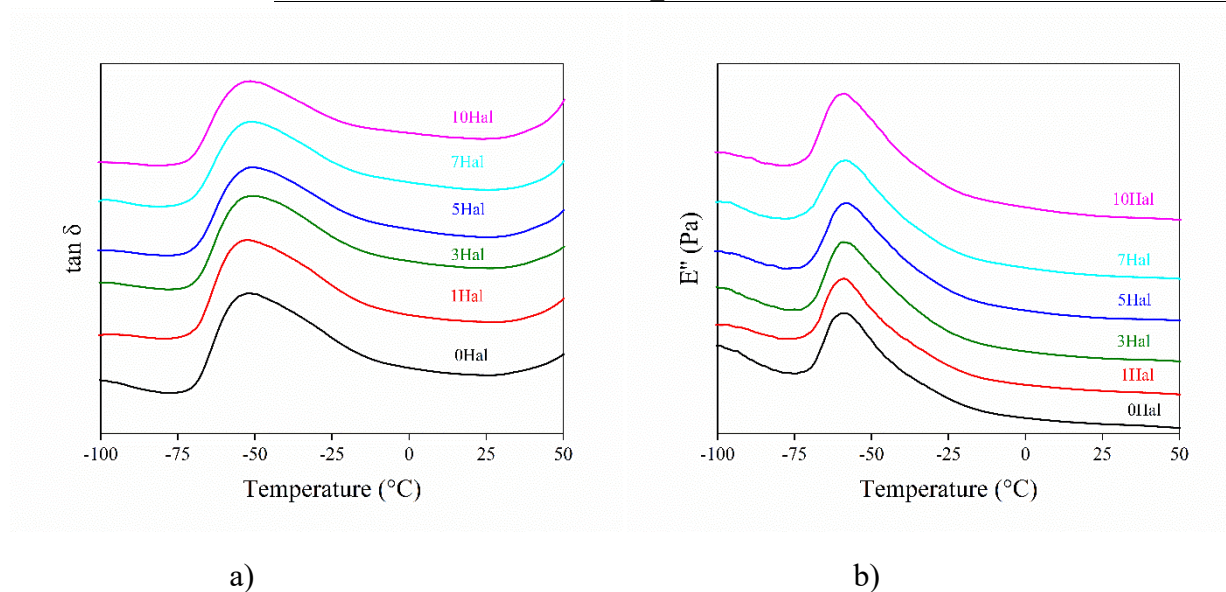

**Figure S43.** Results of DMA measurements of PCL/halloysite composites prepared by internal mixer. **a)**  $\tan \delta$ , **b)** loss modulus.

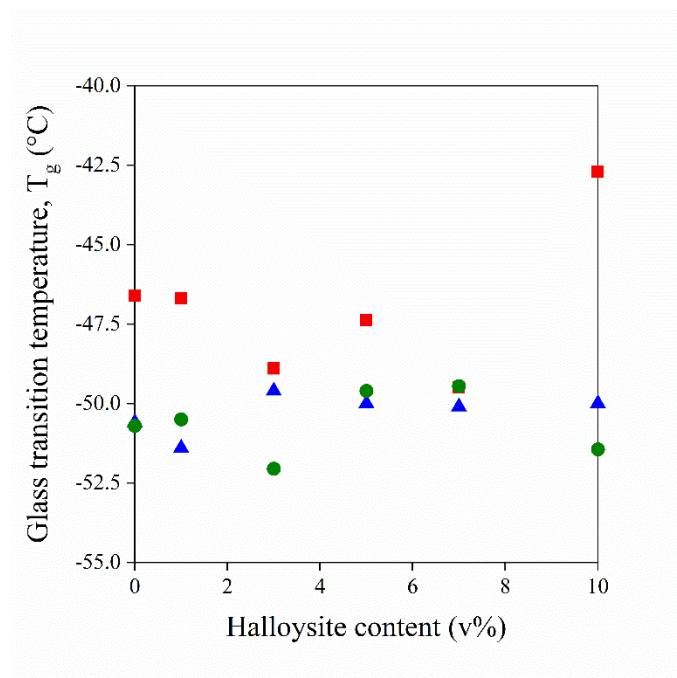

**Figure S44.** Glass transition temperatures ( $T_g$ ) derived from  $\tan \delta$  values of PCL/halloysite composites. Symbols: (■) film casting, (▲) internal mixer, (●) compression molding.

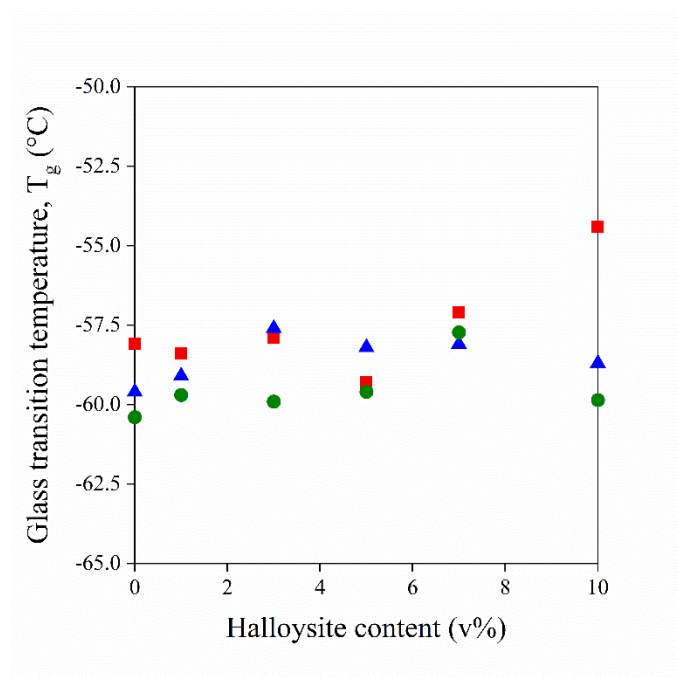

**Figure S45.** Glass transition temperatures ( $T_g$ ) derived from  $E''$  values of PCL/halloysite composites. Symbols: (■) film casting, (▲) internal mixer, (●) compression molding.
